# Supplementary material
Source: Research Square preprint supplement (doi:10.21203/rs.3.rs-10046331/v1)
Supplement: Supplementary file 1 [file e0f2b6375d089b3cb6418827.docx]

**Supplementary tables**

**Table 1: Effect of nitrogen scheduling along with Zn and B on Economics of Indian mustard.**

| **Treatment** | **2020-21** | | | | **2021-22** | | | |
| --- | --- | --- | --- | --- | --- | --- | --- | --- |
| **Cost of cultivation (Rs/ha)** | **Gross return (Rs/ha)** | **Net return (Rs/ha)** | **Benefit Cost Ratio (B:C)** | **Cost of cultivation (Rs/ha)** | **Gross return (Rs/ha)** | **Net return (Rs/ha)** | **Benefit Cost Ratio (B:C)** |
| T1 | 27675.00 | 62141.75 | 34466.75 | 1.25 | 27675.00 | 63193.50 | 35518.50 | 1.28 |
| T2 | 27272.00 | 60991.25 | 33719.25 | 1.24 | 27272.00 | 62821.50 | 35549.50 | 1.30 |
| T3 | 27675.00 | 64678.75 | 37003.75 | 1.34 | 27675.00 | 66557.00 | 38882.00 | 1.40 |
| T4 | 27675.00 | 56817.00 | 29142.00 | 1.05 | 27675.00 | 58171.50 | 30496.50 | 1.10 |
| T5 | 27272.00 | 47672.00 | 20400.00 | 0.75 | 27272.00 | 48747.50 | 21475.50 | 0.79 |
| T6 | 32057.00 | 76464.00 | 44407.00 | 1.39 | 32057.00 | 78755.50 | 46698.50 | 1.46 |
| T7 | 31672.00 | 70977.00 | 39305.00 | 1.24 | 31672.00 | 73175.50 | 41503.50 | 1.31 |
| T8 | 32057.00 | 82998.25 | 50941.25 | 1.59 | 32057.00 | 85947.50 | 53890.50 | 1.68 |
| T9 | 32057.00 | 71626.00 | 39569.00 | 1.23 | 32057.00 | 73609.50 | 41552.50 | 1.30 |
| T10 | 31672.00 | 68410.50 | 36738.50 | 1.16 | 31672.00 | 70153.00 | 38481.00 | 1.21 |
| T11 | 27675.00 | 47465.50 | 19790.50 | 0.72 | 27675.00 | 48716.50 | 21041.50 | 0.76 |
| T12 | 32057.00 | 67392.75 | 35335.75 | 1.10 | 32057.00 | 69347.00 | 37290.00 | 1.16 |

*(#T1: N @30, 30, 30, 30 kg ha-1 at 15, 30, 45, 60 DAS respectively; T2: N @30, 30, 30 kg ha-1 at 15, 30, 45 DAS respectively; T3: N @30, 60, 30 kg ha-1 at 15, 30,45 DAS respectively; T4: N @30, 30, 30, 30 kg ha-1 at 0, 15, 30, 45 DAS respectively; T5: N @30, 30, 30 kg ha-1 at 0, 15, 30 DAS respectively; T6: T1 + Zn + B; T7: T2 + Zn + B; T8: T3 + Zn + B; T9: T4 + Zn + B; T10: T5 + Zn + B; T11: RDF (NPK); and T12: RDF (NPK) + Zn + B, *Zn @25kg ha-1; B @10kg ha-1 and RDF (120:60:40 kg ha-1 of N: P2O5: K2O).*

**Table 2. Effect of nitrogen scheduling along with Zn and B on different yields of Indian mustard.**

| Treatment | Seed yield (t/ha) | | | Stover yield (t/ha) | | | Biological yield (t/ha) | | |
| --- | --- | --- | --- | --- | --- | --- | --- | --- | --- |
| **2020-21** | **2021-22** | **Mean** | **2020-21** | **2021-22** | **Mean** | **2020-21** | **2021-22** | **Mean** |
| T1 | 1.40 | 1.36 | 1.38 | 5.41 | 5.38 | 5.40 | 6.82 | 6.74 | 6.78 |
| T2 | 1.38 | 1.35 | 1.36 | 5.15 | 5.12 | 5.14 | 6.53 | 6.47 | 6.50 |
| T3 | 1.46 | 1.43 | 1.45 | 4.40 | 5.05 | 4.73 | 5.86 | 6.48 | 6.17 |
| T4 | 1.28 | 1.25 | 1.27 | 5.04 | 5.02 | 5.03 | 6.33 | 6.27 | 6.30 |
| T5 | 1.08 | 1.05 | 1.06 | 4.27 | 4.21 | 4.24 | 5.34 | 5.26 | 5.30 |
| T6 | 1.73 | 1.69 | 1.71 | 6.16 | 6.13 | 6.15 | 7.89 | 7.83 | 7.86 |
| T7 | 1.60 | 1.57 | 1.59 | 5.85 | 5.66 | 5.75 | 7.45 | 7.23 | 7.34 |
| T8 | 1.88 | 1.85 | 1.86 | 6.38 | 6.34 | 6.36 | 8.26 | 8.19 | 8.22 |
| T9 | 1.62 | 1.58 | 1.60 | 5.67 | 5.64 | 5.66 | 7.29 | 7.23 | 7.26 |
| T10 | 1.55 | 1.51 | 1.53 | 5.83 | 5.82 | 5.82 | 7.38 | 7.32 | 7.35 |
| T11 | 1.07 | 1.05 | 1.06 | 4.56 | 4.65 | 4.60 | 5.76 | 5.70 | 5.73 |
| T12 | 1.52 | 1.49 | 1.51 | 6.21 | 6.18 | 6.19 | 7.73 | 7.67 | 7.70 |
| SEm± | 0.09 | 0.09 | 0.09 | 0.36 | 0.35 | 0.35 | 0.52 | 0.36 | 0.44 |
| CD (p=0.05) | 0.26 | 0.26 | 0.26 | 1.05 | 1.01 | 1.03 | 1.54 | 1.05 | 1.30 |

*(#T1: N @30, 30, 30, 30 kg ha-1 at 15, 30, 45, 60 DAS respectively; T2: N @30, 30, 30 kg ha-1 at 15, 30, 45 DAS respectively; T3: N @30, 60, 30 kg ha-1 at 15, 30,45 DAS respectively; T4: N @30, 30, 30, 30 kg ha-1 at 0, 15, 30, 45 DAS respectively; T5: N @30, 30, 30 kg ha-1 at 0, 15, 30 DAS respectively; T6: T1 + Zn + B; T7: T2 + Zn + B; T8: T3 + Zn + B; T9: T4 + Zn + B; T10: T5 + Zn + B; T11: RDF (NPK); and T12: RDF (NPK) + Zn + B, *Zn @25kg ha-1; B @10kg ha-1 and RDF (120:60:40 kg ha-1 of N: P2O5: K2O).*
